# Supplementary material for: The Potential Clinical Relevance of the WISC-V in ADHD Assessment: An Analysis of Structural Models and Within- Subject Cognitive Discrepancies
Source: Research Square preprint supplement (doi:10.21203/rs.3.rs-8378890/v1), 2026-01-29
Supplement: Supplementary file 1 [file 38125fedb19392b4bf82cb3c.docx]

**Table 2**

*Confirmatory factor analysis fit statistic for the 10 primary subtests WISC-VSpain ADHD sample (N = 241)*

| Model | | χ²(*df*) | CFI | ΔCFI | TLI | ΔTLI | RMSEA | ΔRMSEA | 90% CI RMSEA | AIC | ΔAIC |
| --- | --- | --- | --- | --- | --- | --- | --- | --- | --- | --- | --- |
| Current Study | |  |  |  |  |  |  |  |  |  |  |
|  | 4 high-ordera | 40.6(34) | .986 | .009 | .982 | .006 | .028 | .004 | **.000-.057** | **10978** | 2 |
|  | 4 high-order | 40.5(31) | .980 | .015 | .971 | .017 | .036 | .012 | .000-.064 | 10983 | 5 |
|  | 4+1 bifactora | 20.4(18) | **.995** | **0** | **.988** | **0** | **.024** | **0** | .000-.064 | 10989 | 0 |
|  | 5 high-ordera,d | 53.9(35) | .961 | .034 | .950 | 0.38 | .047 | .023 | .018-.071 | 10989 | 0 |
|  | 5 high-order | 47.2(30) | .964 | .031 | .947 | 0.41 | .049 | .025 | .018-.074 | 10992 | 14 |
|  | 5+1bifactora, b,d | 14.5(17) | 1.00 | - | 1.01 | - | .000 | - | .000-.050 | 10985 | - |
| WISC-VSpain Wechsler modelc | |  |  |  |  |  |  |  |  |  |  |
|  | 5 high-order | 87.5(25) | .98 |  | .97 |  | .05 |  |  | 148 |  |
| Fenollar-Cortés & Watkins (2019) | |  |  |  |  |  |  |  |  |  |  |
|  | 4 high-order | 122.9(31) | .972 | .015 | .960 | .019 | .054 | .015 | .044-.064 | 47507 | 46.3 |
|  | 5 high-ordera,d | 89.5(30) | .982 | .005 | .973 | .006 | .044 | .005 | .034-.055 | 47478 | 14.8 |
|  | 4+1bifactora | 70.7(28) | **.987** | 0 | **.979** | 0 | **.039** | 0 | .028-.050 | **47461** | **0** |
|  | 5+1bifactora,d | 89.5(30) | .982 | .005 | .973 | .006 | .044 | .005 | .034-.055 | 47486 | 14.8 |

*Note*. CFI = Comparative Fit Index, TLI = Tucker–Lewis Index, RMSEA = Root Mean Square Error of Approximation, AIC = Akaike’s Information Criterion. These models correspond to those listed in Table 1. Each index in the reference model is indicated in bold. Indices are not meaningfully different (ΔCFI and ΔTLI < .01, ΔRMSEA > .015, ΔAIC≤10) from the reference model shaded.

aModels with only two indicators for group factors were constrained to equality for identification.

bImproper solution. Non-negative constraints were imposed on the residual variances of 'Figure Weights' and 'Matrix Reasoning' to address their initially negative or excessively high residual variance estimates.

cThe goodness of fit statistics corresponds to an analysis conducted on a general population sample.

dNot statiscally distinguishable due to the constraints needed to identify five factors with only 10 indications
