# Supplementary material for: The Potential Clinical Relevance of the WISC-V in ADHD Assessment: An Analysis of Structural Models and Within- Subject Cognitive Discrepancies
Source: Research Square preprint supplement (doi:10.21203/rs.3.rs-8378890/v1), 2026-01-29
Supplement: Supplementary file 2 [file e426d35f98be5fc131d94110.docx]

**Supplementary Materials**

**Table 3**

*Summary of Structural Model Analyses for the WISC-V: Localized Areas of Strain, Standardized Residual Variances, and Factor Loadings*

|  | | Localized Areas of Strain | |  |  |
| --- | --- | --- | --- | --- | --- |
| Model | | Range of Standardized Residuals | Higher Modification Indice | Range of Standardized Residual Variances | Range of Standardized Factor loadings |
| Current Study | |  |  |  |  |
|  | 4 high-ordera | -2.28 to 1.89 | 9.73 | 0.45 to 0.79 | .459 to .880 |
|  | 4+1 bifactora | -0.35 to 0.53 | 8.30 | 0.42 to 0.77 | .153 to 1.05 |
|  | 5 high-ordera | -2.69 to 3.03 | 15.45 | 0.45 to 0.79 | .132 to .881 |

aModels with only two indicators for group factors were constrained to equality for identification.

bNon-negative constraints were imposed on the residual variances of 'Figure Weights' and 'Matrix Reasoning' to address their initially negative or excessively high residual variance estimates.

**Table 4**

*Sources of variance for WISC-V clinical sample (N = 241) primary subtests according to a Bifactor Wechsler model (4+1).*

|  | General | | Verbal Comprehension | | Visual Spatial | | Working Memory | | Processing Speed | |  |  |  |
| --- | --- | --- | --- | --- | --- | --- | --- | --- | --- | --- | --- | --- | --- |
| Subtest | *b* | *b*2 | *b* | *b*2 | *b* | *b*2 | *b* | *b*2 | *b* | *b*2 | *h*2 | *u*2 | ECV |
| Similarities | .64 | .410 | **1.05** | .103 |  |  |  |  |  |  | .512 | .512 | .27 |
| Vocabulary | .68 | .462 | **1.02** | .040 |  |  |  |  |  |  | .503 | .503 | .31 |
| Block Design | **.76** | .578 |  |  | **.93** | .865 |  |  |  |  | .443 | .443 | .40 |
| Vissual Puzzles | .64 | .410 |  |  | **.87** | .757 |  |  |  |  | .167 | .167 | .35 |
| Matrix Reasoning | .64 | .410 |  |  | **.72** | .518 |  |  |  |  | .928 | .072 | .44 |
| Figure Weights | **.73** | .533 |  |  | **.74** | .548 |  |  |  |  | .080 | .080 | .49 |
| Digit Span | *.43* | .185 |  |  |  |  | *.35* | .122 |  |  | .307 | .693 | .60 |
| Picture Span | .61 | .372 |  |  |  |  | *.27* | .073 |  |  | .445 | .555 | .84 |
| Coding | *.26* | .068 |  |  |  |  |  |  | **.77** | .593 | .660 | .340 | .10 |
| Symbol Search | .61 | .372 |  |  |  |  |  |  | **.82** | .672 | .044 | .044 | .36 |
| Total Variance |  | 38.0 |  | 21.4 |  | 26.0 |  | 2.00 |  | 12.7 | 100.1 | 9.00 |  |
| ECV |  | 37.6 |  | 21.2 |  | 26.6 |  | 1.90 |  | 12.5 |  |  |  |
| H |  | .874 |  | .028 |  | .922 |  | .179 |  | .778 |  |  |  |

*Note*. *b* = standardized loading of subtest on factor; *b*2 = variance explained in the subtest; *h*2 = communality; *u*2 = uniqueness; and ECV = explained

common variance, *H* is the correlation between a factor and an optimally weighted composite score (Hancock & Mueller, 2001). *g* loadings ≥ .70 are

considered good (bold), from .50 to .69 are fair (italic), and < .50 are poor (Kaufman, 1994).

**Table 5**

*Omega reliability coefficients for WISC-V clinical sample (N = 241) from Bifactor Wechsler model (4+1)*

|  | Bifactor Wechsler 10 primary subtest | |
| --- | --- | --- |
| Factor score | ω/ωs | ωh/ωhs |
| General | .00 | **.67** |
| Verbal Comprehension | .20 | **.86** |
| Visual Spatial | .04 | **.60** |
| Working Memory | .54 | .14 |
| Processing Speed | **.92** | **.71** |

*Note*. ω and ωs = omega of general and group factors, respectively; ωh and ωhs = omega hierarchical of general and group factors, respectively.

Omega coefficients should exceed ~.90 for decisions about individuals (Kranzler & Floyd, 2013). At a minimum, omega hierarchical coefficients

should exceed .50 although .75 would be preferred (Reise, 2012). Coefficients meeting minimum standards are in bold.
