# Supplementary material for: The Potential Clinical Relevance of the WISC-V in ADHD Assessment: An Analysis of Structural Models and Within- Subject Cognitive Discrepancies
Source: Research Square preprint supplement (doi:10.21203/rs.3.rs-8378890/v1), 2026-01-29
Supplement: Supplementary file 3 [file ff95481714498a49774d1a23.docx]

**Table 1**

*Subtests Loading on Each Factor According to the Original and Alternative Structural Models (Hierarchical and Bifactor Models)*

|  |  | High-Order Models | |  | Bifactor Models | | | |
| --- | --- | --- | --- | --- | --- | --- | --- | --- |
|  |  | 4 factors | 5 factors |  | 4 factors | | 5 factors | |
| SI* |  | VC | VC |  | VC | g | VC | g |
| VO* |  | VC | VS |  | VC | g | VC | g |
| BD* |  | VS | VS |  | VS | g | VS | g |
| VP |  | VS | VS |  | VS | g | VS | g |
| MR* |  | VS | FR |  | VS | g | FR | g |
| FW* |  | VS | FR |  | VS | g | FR | g |
| DS* |  | WM | WM |  | WM | g | WM | g |
| PS |  | WM | WM |  | WM | g | WM | g |
| CD* |  | PS | PS |  | PS | g | PS | g |
| SS |  | PS | PS |  | PS | g | PS | g |
| VC |  | g | g |  |  |  |  |  |
| VS |  | g | g |  |  |  |  |  |
| FR |  | - | g |  |  |  |  |  |
| WM |  | g | g |  |  |  |  |  |
| PS |  | g | g |  |  |  |  |  |

**Note**: SI = Similarities, VO = Vocabulary, BD = Block Design, VP = Visual Puzzles, MR = Matrix Reasoning, FW = Figure Weights, DS = Digit Span, PS = Picture Span, CD = Coding, SS = Symbol Search, VC = Verbal Comprehension, VS = Visual Spatial, FR = Fluid Reasoning, WM = Working Memory, PS = Processing Speed, g = General Factor. The Full-Scale Intelligence Quotient (FSIQ) is calculated from the subtests marked with an asterisk (*).
